# Supplementary material
Source: bioRxiv or medRxiv preprint supplement (https://www.biorxiv.org/content/biorxiv/early/2020/08/10/2020.07.30.228544/DC1/embed/media-1.zip)

**A** Eggs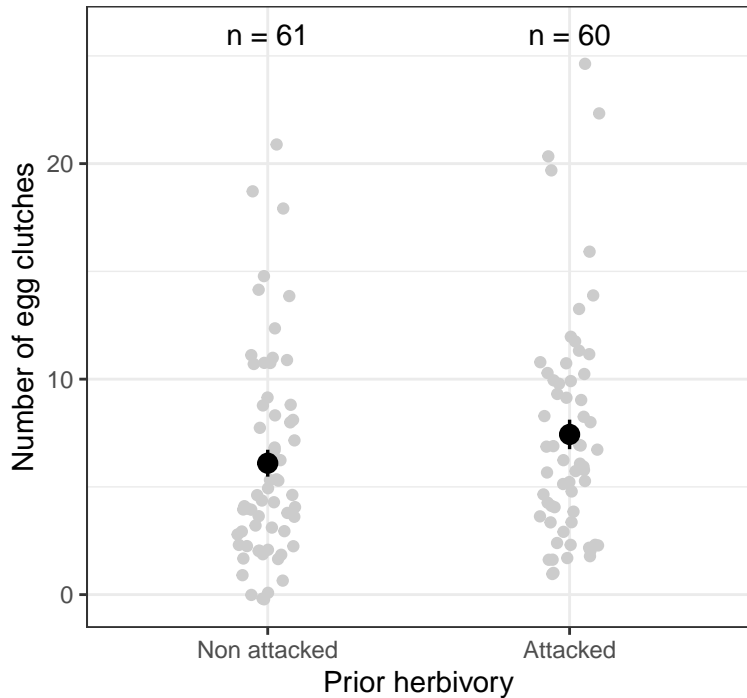**B** Larvae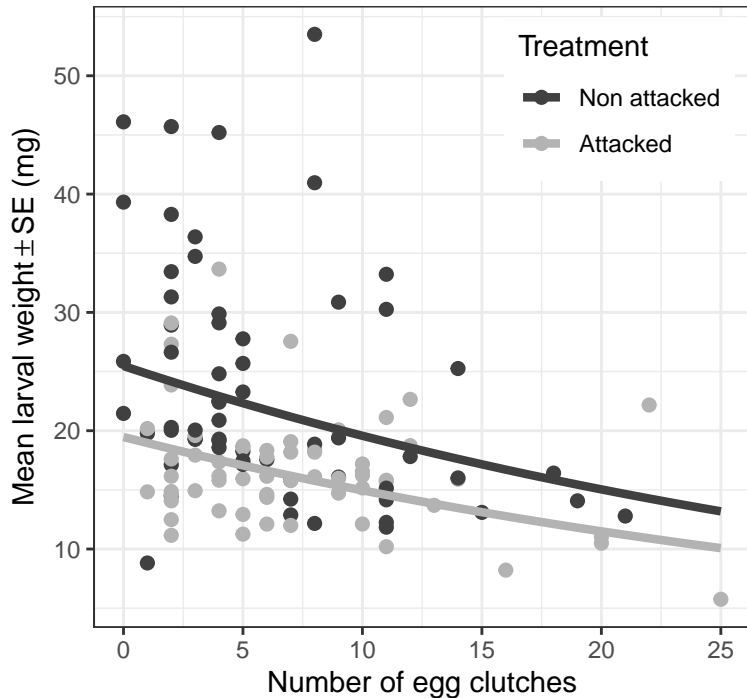

Supplement: Supplementary file [file media-1.zip]
